# Supplementary material
Source: publisher figshare collection journal article supplement (https://acs.figshare.com/ndownloader/files/5701086)

## Supplemental Material

### Formation of Dinuclear, Macrocyclic and Chain Structures from HgI<sub>2</sub> and a Semirigid Benzimidazole-based Bridging Ligand: An Example of Ring-Opening Supramolecular Isomerism

Cheng-Yong Su, Andrea M. Goforth, Mark D. Smith, and Hans-Conrad zur Loye

**Figure. S1.** The molecular structure of the ligand bbimms showing the atom numbering scheme and the thermal motion ellipsoids at the 50% probability level.

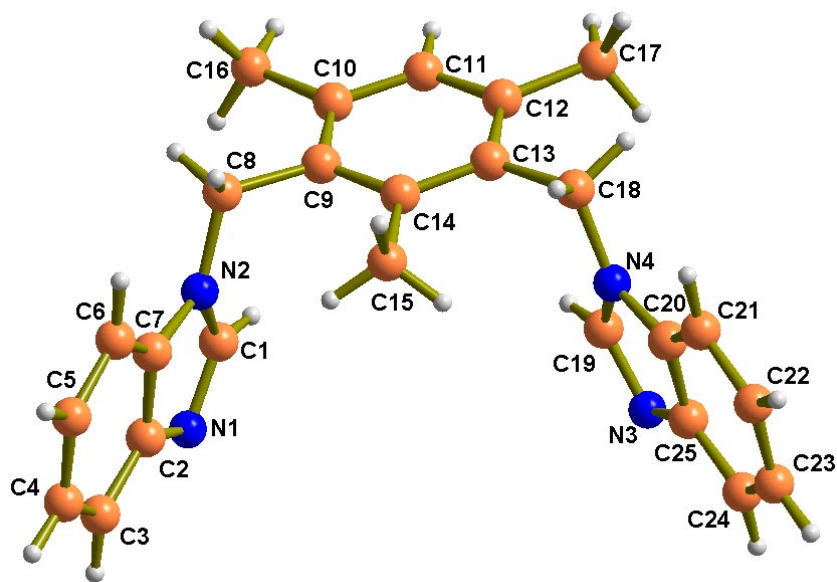

**Figure S2.** Powder X-ray diffraction pattern of a typical batch of complex **3**. (top)  
Simulated powder X-ray diffraction pattern based on single crystal diffraction data.  
(bottom).

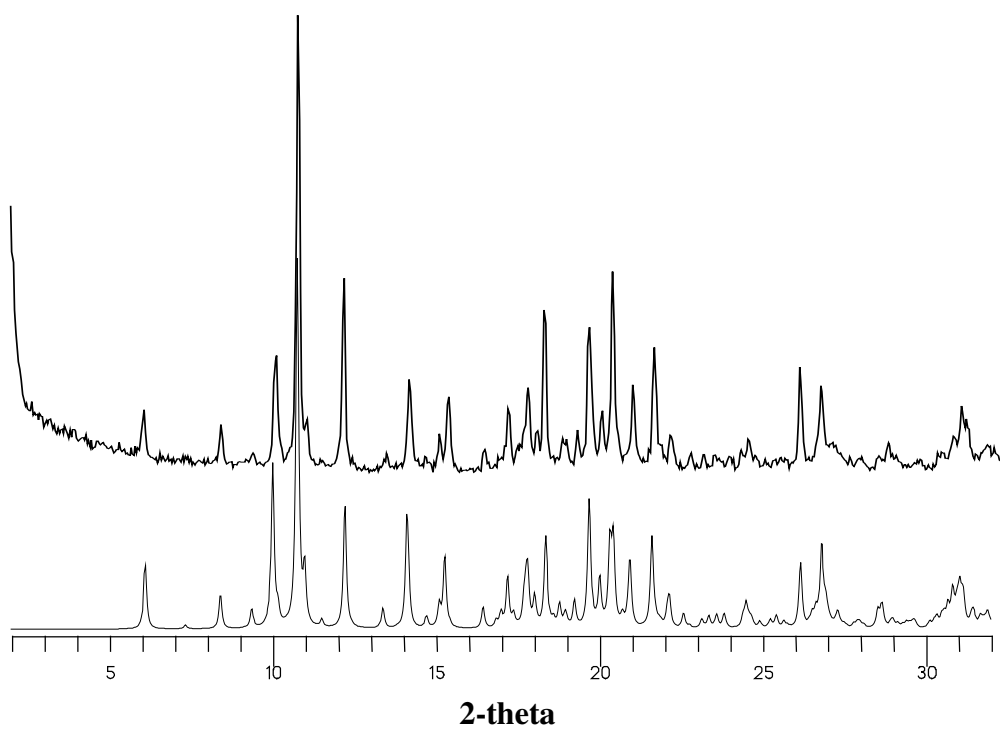

**Figure S3.** XRD patterns of the complex **1** obtained from the arbitrary batch of solid product (top) and the single crystal diffraction simulation (bottom).

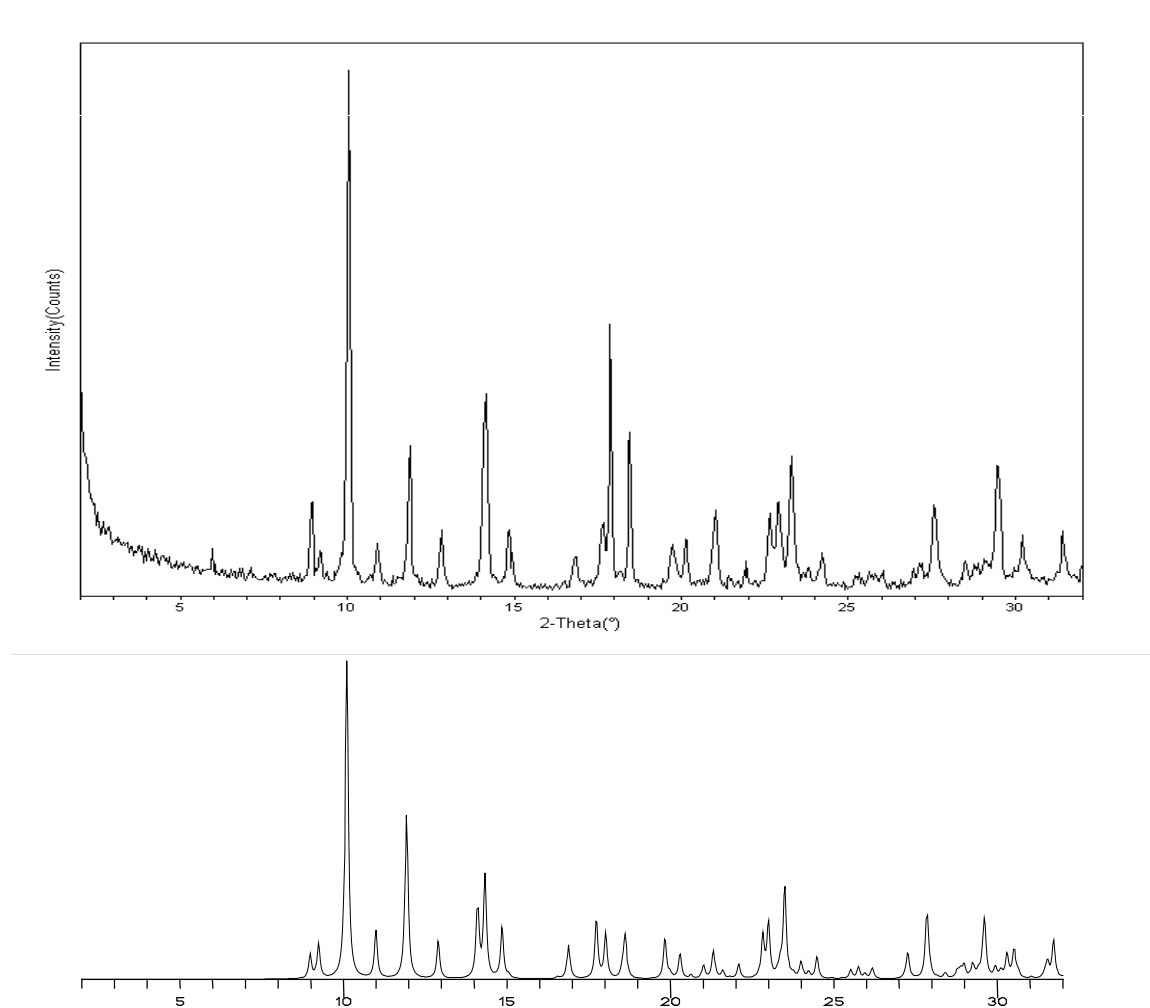

**Figure S4.** XRD patterns of the complex **2** obtained from the arbitrary batch of solid product (top) and the single crystal diffraction simulation (bottom).

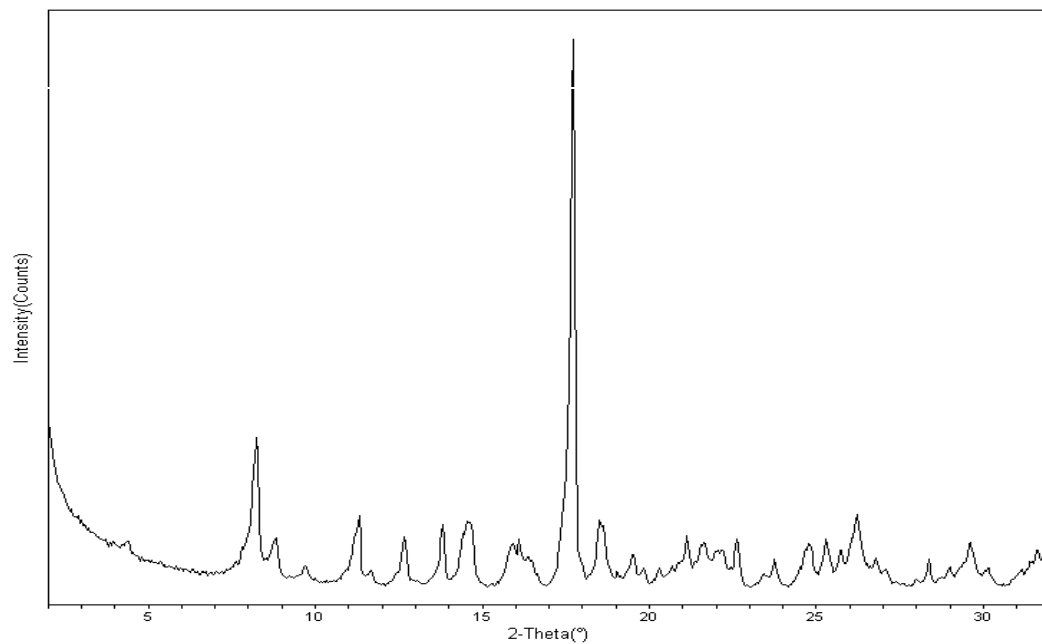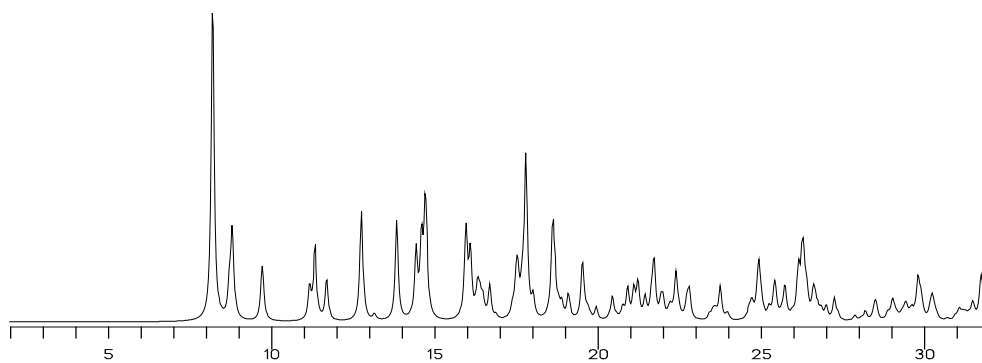

Supplement: Supplementary file 1 [file 5701086]
